# Supplementary material
Source: PubMed Central journal article supplement (PMC2700533)
Supplement: tpc.108.063826_1.pdf [file tpc.108.063826_1.pdf]

Supplemental Data. Noguchi et al. (2009). Local Differentiation of Sugar-donor Specificity of Flavonoid Glycosyltransferase in Lamiales.

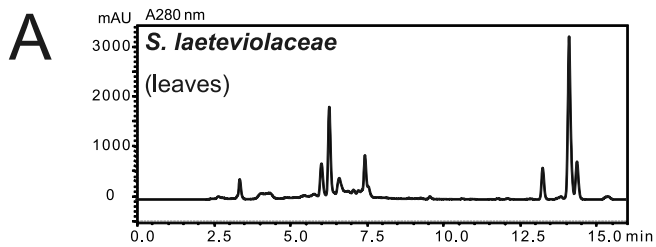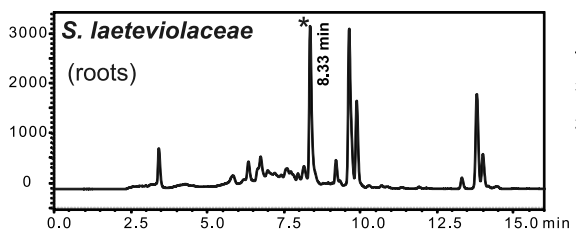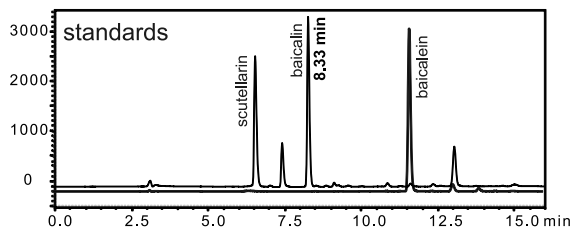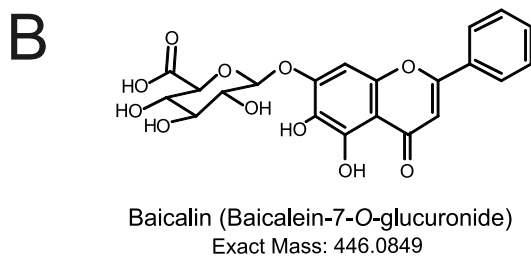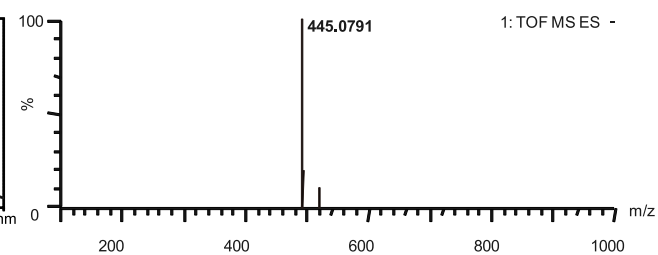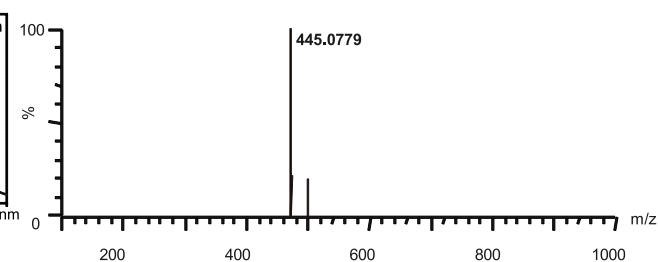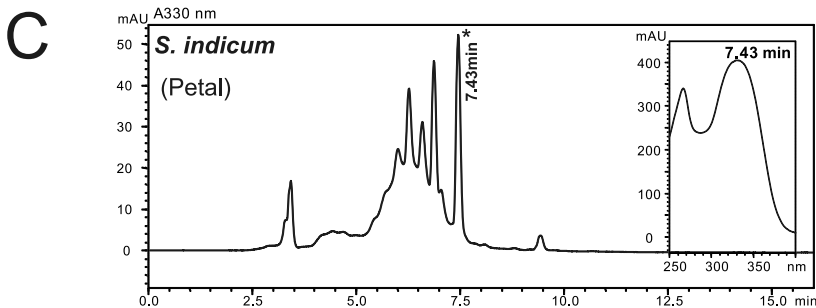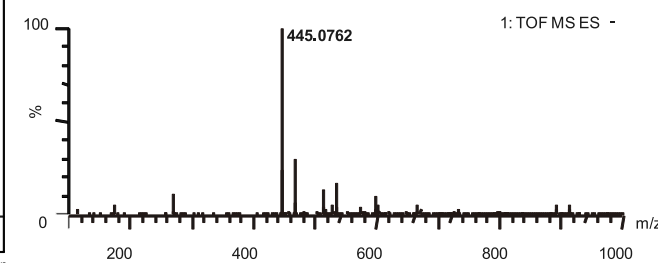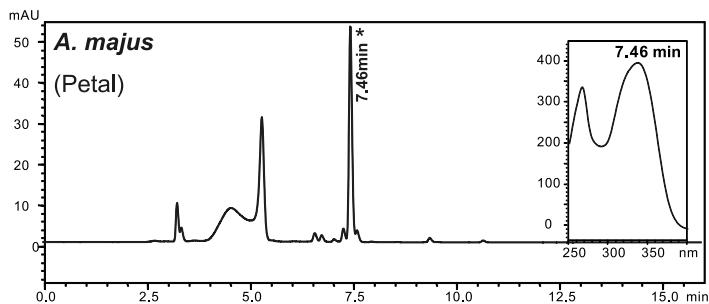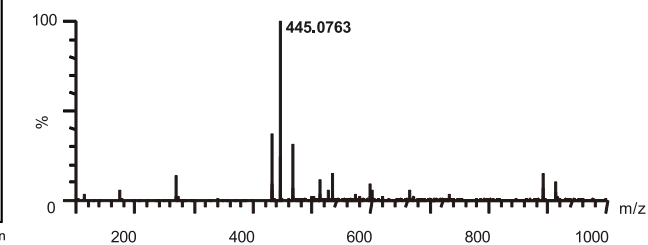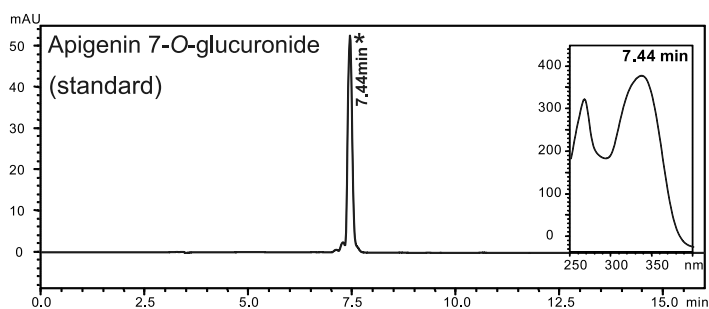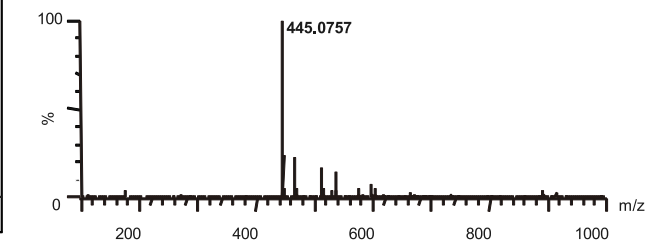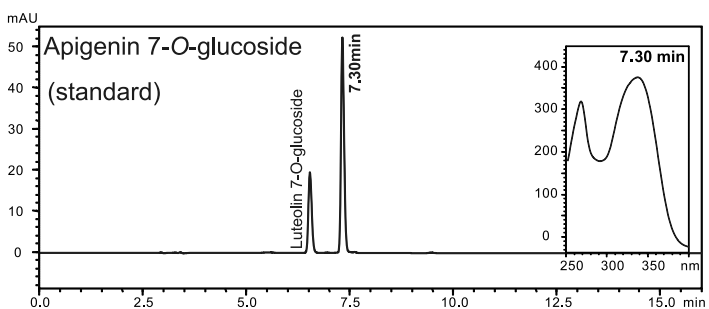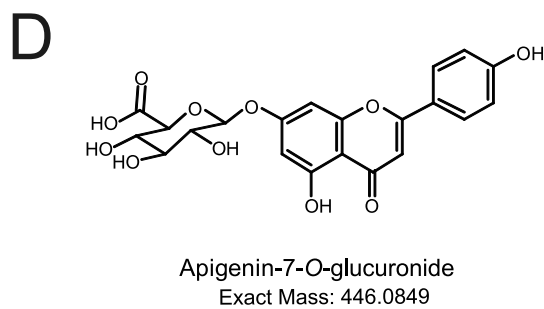

**Supplemental Figure 1. Metabolite profiles of Lamiales plants.**

(A) HPLC chromatograms of the extracts from leaves (top) and roots (middle) of *Scutellaria laeteviolaceae*, and authentic standards (bottom) at A280 nm. The baicalin in the roots is marked by asterisk. UV and MS spectra of baicalin from the roots of *S. laeteviolaceae* and an authentic standard are shown on the right of each chromatogram. (B) Chemical structure of baicalin. (C) HPLC chromatogram of petal extracts from *S. indicum* and *A. majus*, and authentic standards of apigenin 7-O-glucuronide and apigenin 7-O-glucoside at A330 nm (from top to bottom). Asterisk indicates apigenin 7-O-glucuronide, whose UV spectrum is shown in the inset. The mass spectrum of the marked peak is shown on the right of the chromatogram. (D) Chemical structure of apigenin 7-O-glucuronide.

A

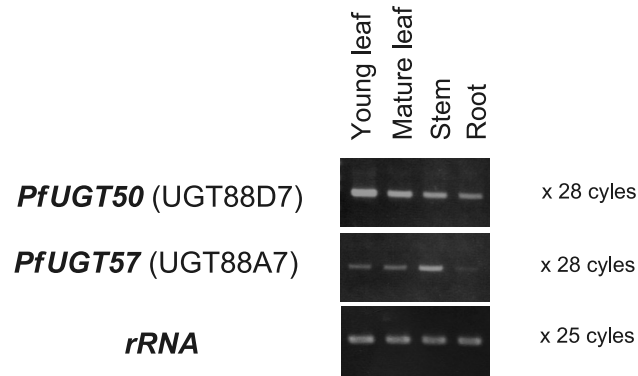

B

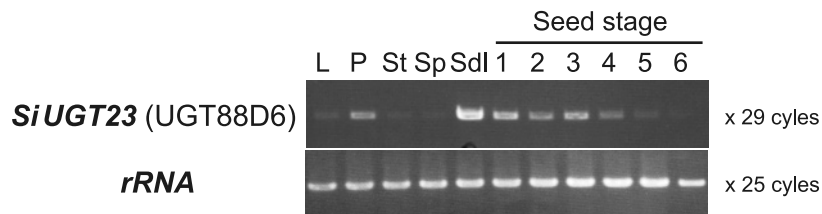

C

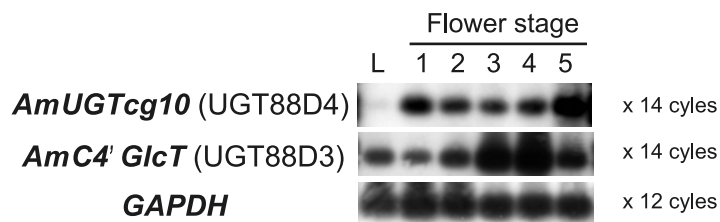

**Supplemental Figure 2, Expression profile of three Lamiales F7GAT genes**

(A) Reverse transcription-polymerase chain reaction (RT-PCR) analysis of *PfUGT50*/UGT88D7 and *PfUGT57*/UGT88A7 in organs of *P. frutescens* cultivar Aochirimem (B) RT-PCR analysis of *SiUGT23*/UGT88D6 in organs of *S. indicum* cultivar Masekin (C) RT-PCR analysis of *AmUGTcg10*/UGT88D4 and *AmC4' GlcT*/UGT88D3 in organs of *A. majus* cultivar Butterfly yellow. L; leaves. These results were replicated by repeated experiments (n=2).

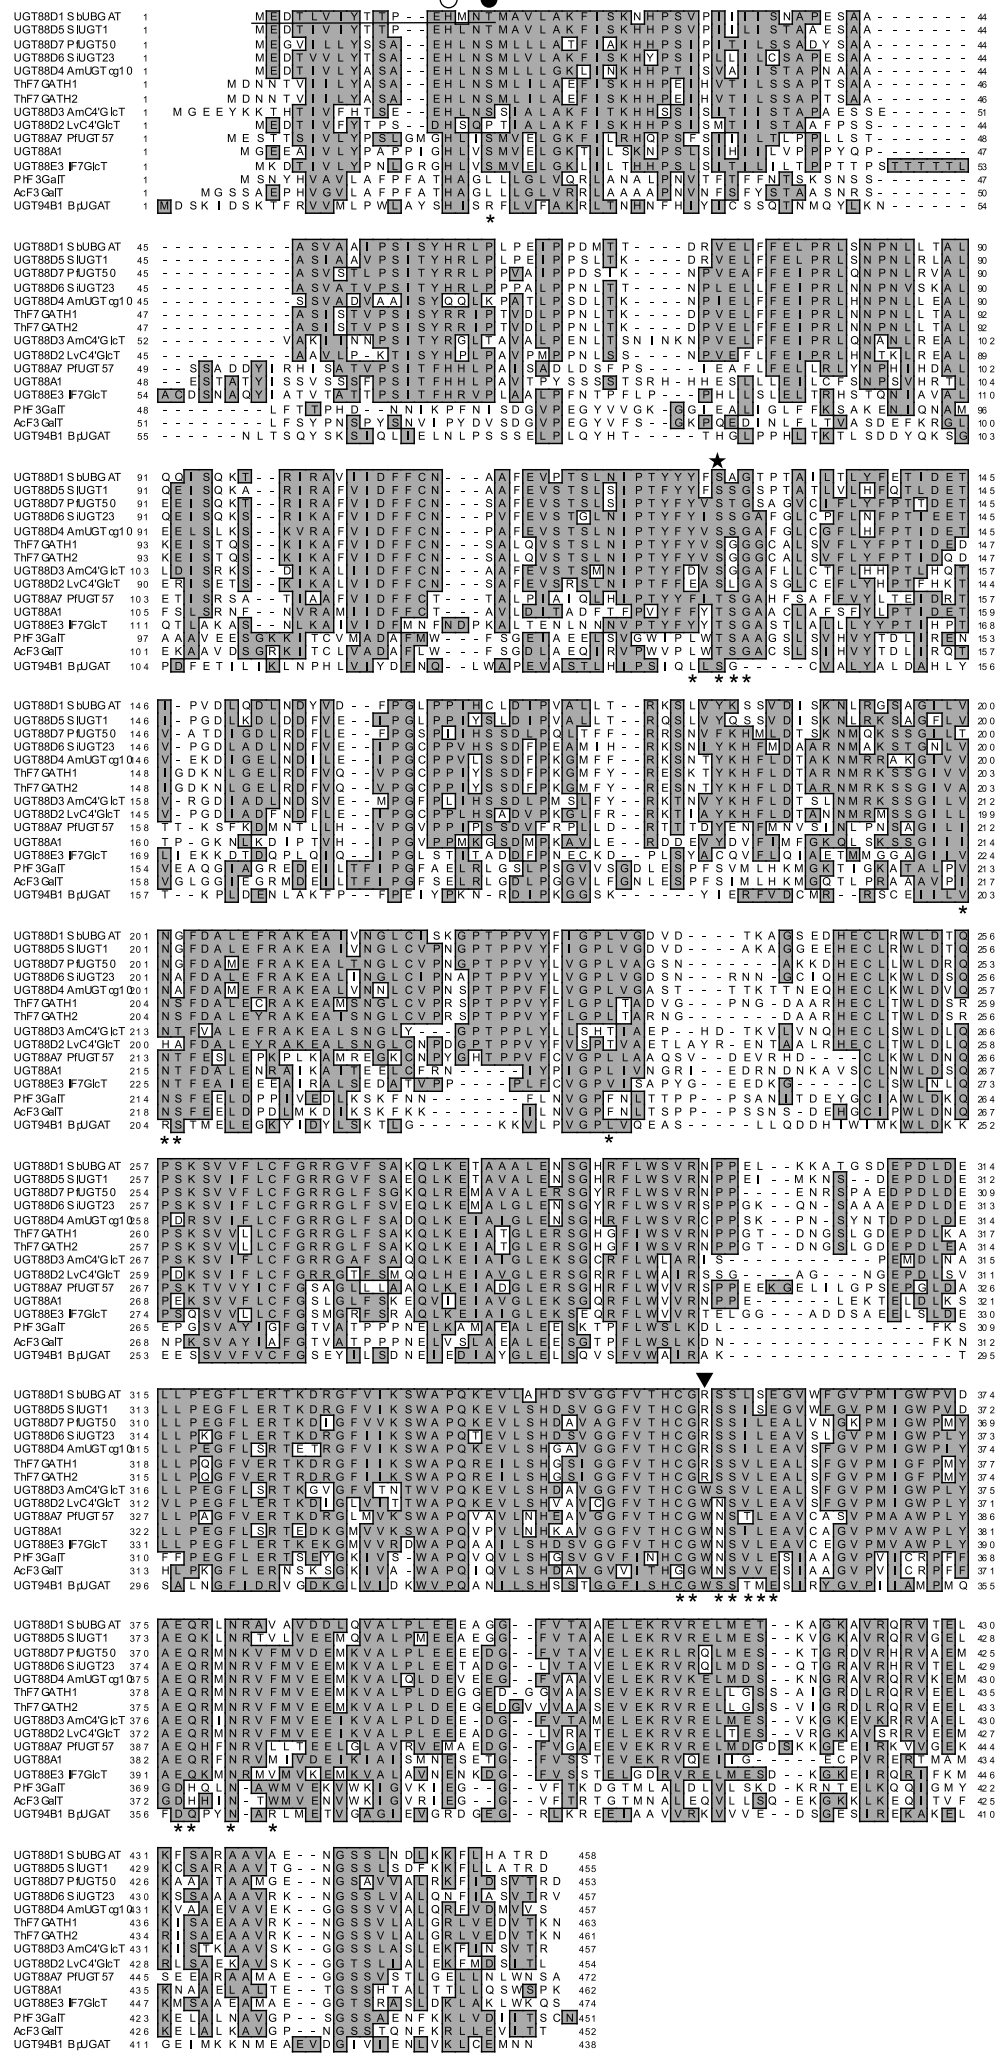

**Supplemental Figure 3. Amino acid alignment of UGT88-related enzymes**  
 The multiple alignment was performed using a CLUSTAL-W program packaged in MACVECTOR 7.2.2 software (Accelrys, San Diego)(Thompson et al., 1994. *Nucleic Acid Res.* 22, 4673-4680). The open circle, black circle, star, and triangle indicate the position of His20 in Vv GT1, Arg25 in UGT94B1, Ser127 in UGT88D7, and Arg350 in UGT88D7, respectively. Other amino acid residues predicted to be in the vicinity of Arg350 (within 5 Å) of UGT88D7 are marked by an asterisk beneath the multiple alignment. The region of SbUGAT extended by 5'RACE is underlined.

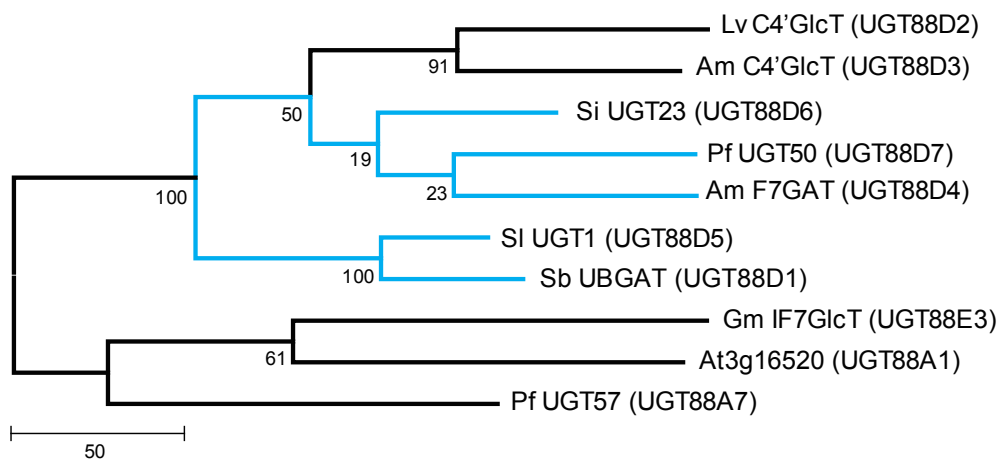

#### Supplemental Figure 4 Evolutionary relationships of cluster IIIb of flavonoid UGTs

The evolutionary history was inferred using the Maximum Parsimony (MP) method (Eck, R. V. and Dayhoff, M. O. 1966. Atlas of Protein Sequence and Structure. National Biomedical Research Foundation, Silver Springs, Maryland). The consistency index is (0.775033), the retention index is (0.551813), and the composite index is 0.460635 (0.427673) for all sites and parsimony-informative sites (in parentheses). The percentage of replicate trees in which the associated taxa clustered together in the bootstrap test (1000 replicates) is shown next to the branches (Felsenstein, J. 1985. *Evolution* **39**:783-791). The MP tree was obtained using the Close-Neighbor-Interchange algorithm (Nei, M. and Kumar, S. 2000. Molecular Evolution and Phylogenetics. Oxford University Press, New York.3, pg. 128) with search level 3 in which the initial trees were obtained with the random addition of sequences (10 replicates). The tree is drawn to scale, with branch lengths calculated using the average pathway method and are in the units of the number of changes over the whole sequence. All positions containing gaps and missing data were eliminated from the dataset (Complete Deletion option). There were a total of 410 positions in the final dataset, out of which 210 were parsimony informative. Blue line indicates the lineages of Lamiales F7GATs. Phylogenetic analyses were conducted using MEGA4 software (Tamura, K., et al., 2007. *Mol. Biol. Evol.* **24**:1596-1599).

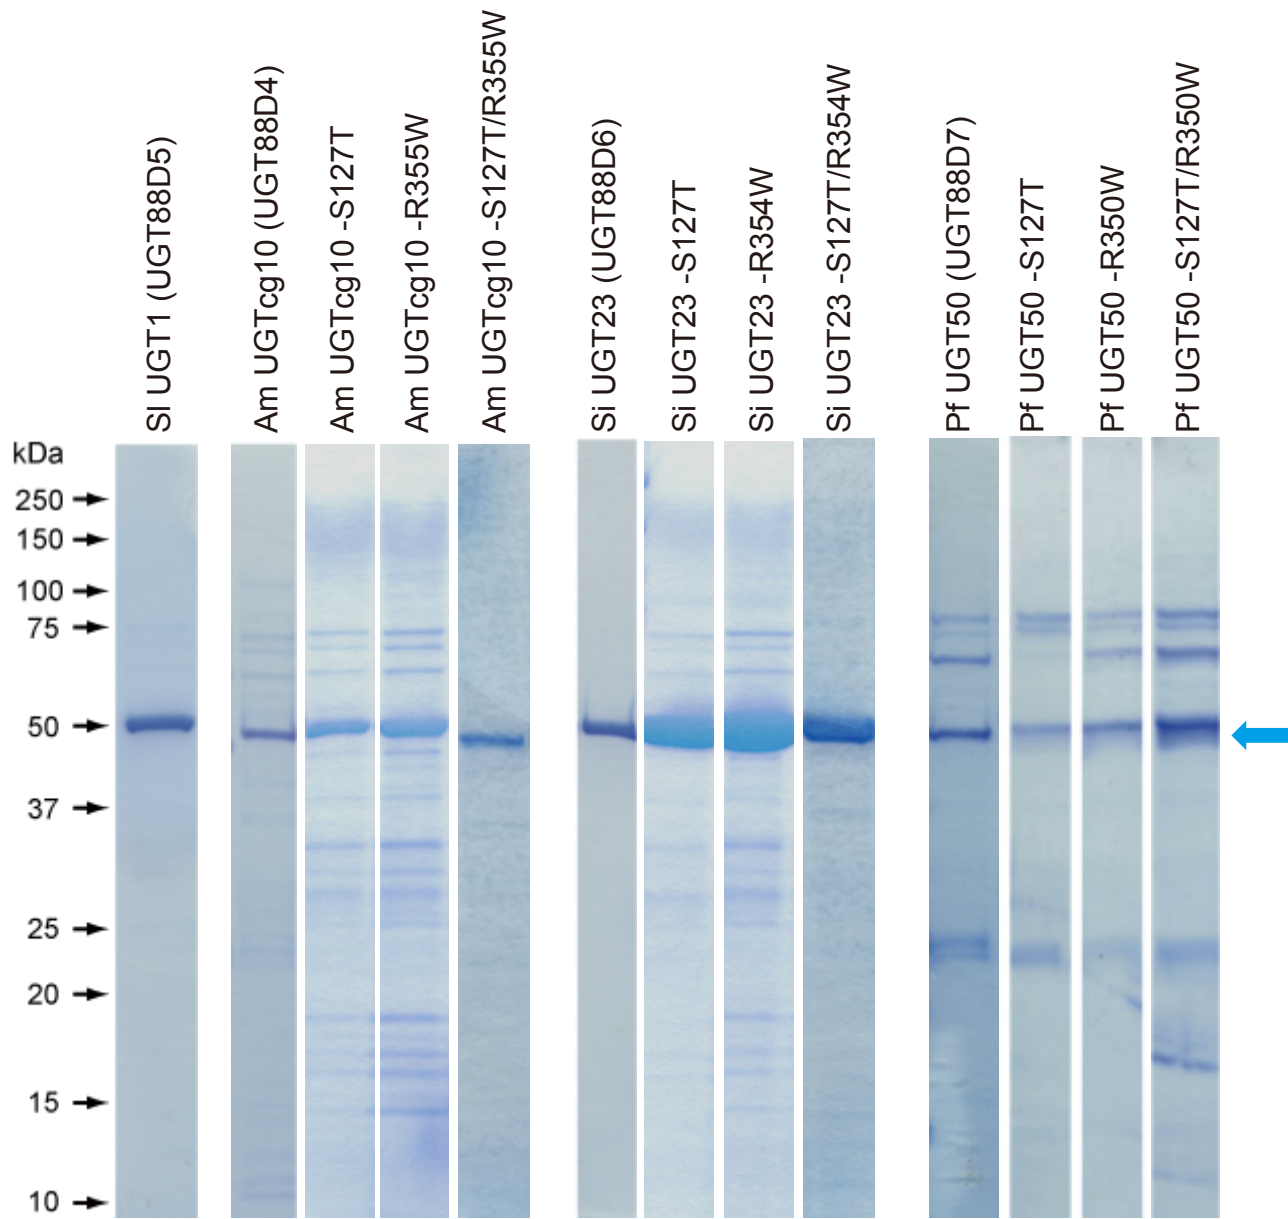

**Supplemental Figure 5. SDS-PAGE after affinity purification of His-Tagged Lamiales F7GAT proteins expressed in *E. coli*.**

Four His-Tagged Lamiales F7GAT proteins and their mutants were eluted with 200 mM imidazole, stained with Coomassie Blue, and detected as a major band close to the 50 kDa size expected from the molecular weight calculation (arrow). Using bovine serum albumin as a standard, the protein concentration was determined by the intensity of the protein band on the SDS-polyacrylamide gel.

Supplemental Table 1, NMR of apigenin 7-*O*-glucuronide

(in DMSO-*d*6)

| #  | <sup>1</sup> H<br>δ |     | <i>J</i><br>Hz | <sup>13</sup> C |
|----|---------------------|-----|----------------|-----------------|
| 1  |                     |     |                | 164.21          |
| 2  |                     |     |                | 103.05          |
| 3  | 6.87                | s   |                | 181.91          |
| 4  |                     |     |                | 161.09          |
| 5  |                     |     |                | 99.26           |
| 6  | 6.47                | d   | 2              | 162.39          |
| 7  |                     |     |                | 94.55           |
| 8  | 6.86                | d   | 2              | 156.86          |
| 9  |                     |     |                | 105.36          |
| 10 |                     |     |                | 120.92          |
| 1' |                     |     |                | 128.52          |
| 2' | 7.96                | d   | 9              | 115.91          |
| 3' | 6.95                | d   | 9              | 161.28          |
| 4' |                     |     |                | 115.91          |
| 5' | 6.95                | d   | 9              | 128.52          |
| 6' | 7.96                | d   | 9              |                 |
| G1 | 5.28                | d   | 7              | 99.04           |
| G2 | 3.41                | brt | 9              | 72.66           |
| G3 | 3.33                | brt | 9              | 75.53           |
| G4 | 3.33                | brt | 9              | 71.13           |
| G5 | 4.05                | d   | 9.5            | 75.30           |
| G6 |                     |     |                | 169.94          |

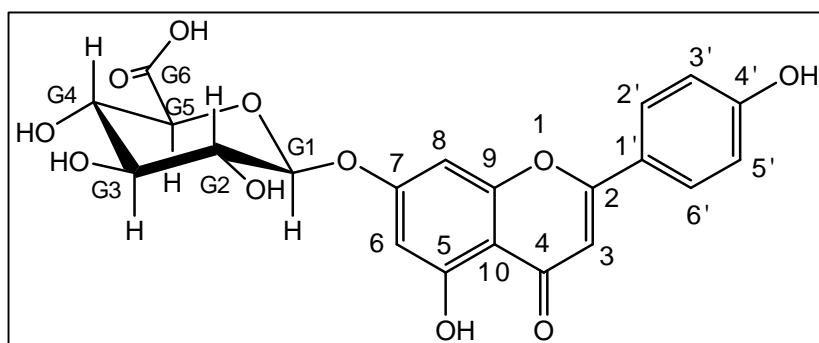

<sup>1</sup>H and <sup>13</sup>C NMR chemical shifts and structure of the apigenin 7-*O*-monoglucuronide that was used as the standard in the enzyme assays

**Supplemental Table 2, Kinetics of Lamiales F7GATs.**

## Pf UGT50/UGT88D7

| Acceptor     | $K_m(\mu\text{M})$ | $k_{\text{cat}}(\text{s}^{-1})$ | $k_{\text{cat}}/K_m (\text{S}^{-1} \cdot \text{mM}^{-1})$ |
|--------------|--------------------|---------------------------------|-----------------------------------------------------------|
| Apigenin     | 11 ± 3             | 8.8 ± 0.5                       | 800                                                       |
| Baicalein    | 49 ± 11            | 4.3 ± 0.3                       | 88                                                        |
| Scutellarein | 120 ± 59           | 19 ± 3                          | 150                                                       |
| Kaempferol   | 100 ± 24           | 4.0 ± 0.4                       | 38                                                        |
| Quercetin    | 130 ± 100          | 5.9 ± 2.1                       | 47                                                        |
| Naringenin   | 680 ± 26           | 6.6 ± 0.2                       | 10                                                        |
| UDP-GA       | 36 ± 4             |                                 | 120                                                       |

## Am UGTcg10/UGT88D4

| Acceptor     | $K_m(\mu\text{M})$ | $k_{\text{cat}}(\text{s}^{-1})$ | $k_{\text{cat}}/K_m (\text{S}^{-1} \cdot \text{mM}^{-1})$ |
|--------------|--------------------|---------------------------------|-----------------------------------------------------------|
| Apigenin     | 560 ± 450          | 17 ± 8                          | 30                                                        |
| Baicalein    | 52 ± 20            | 3.6 ± 0.4                       | 70                                                        |
| Scutellarein | 46 ± 27            | 29 ± 8                          | 640                                                       |
| Kaempferol   | 6.7 ± 1.9          | 11 ± 1                          | 1600                                                      |
| Quercetin    | 210 ± 140          | 3.4 ± 1.1                       | 16                                                        |
| Naringenin   | 100 ± 3            | 17 ± 0.2                        | 170                                                       |
| UDP-GA       | 70 ± 15            |                                 | 51                                                        |

## Si UGT23/UGT88D6

| Acceptor     | $K_m(\mu\text{M})$ | $k_{\text{cat}}(\text{s}^{-1})$ | $k_{\text{cat}}/K_m (\text{S}^{-1} \cdot \text{mM}^{-1})$ |
|--------------|--------------------|---------------------------------|-----------------------------------------------------------|
| Apigenin     | 21 ± 25            | 17 ± 7                          | 800                                                       |
| Baicalein    | 21 ± 16            | 9.2 ± 2.0                       | 450                                                       |
| Scutellarein | 78 ± 30            | 24 ± 4                          | 300                                                       |
| Kaempferol   | 130 ± 10           | 10 ± 1                          | 79                                                        |
| Quercetin    | 160 ± 80           | 7.3 ± 1.7                       | 47                                                        |
| Naringenin   | 100 ± 10           | 3.2 ± 0.1                       | 31                                                        |
| UDP-GA       | 16 ± 3             |                                 | 570                                                       |

## SI UGT1/UGT88D5

| Acceptor     | $K_m(\mu\text{M})$ | $k_{\text{cat}}(\text{s}^{-1})$ | $k_{\text{cat}}/K_m (\text{S}^{-1} \cdot \text{mM}^{-1})$ |
|--------------|--------------------|---------------------------------|-----------------------------------------------------------|
| Apigenin     | 65 ± 26            | 0.46 ± 0.07                     | 7.1                                                       |
| Baicalein    | 93 ± 24            | 10 ± 1                          | 110                                                       |
| Scutellarein | 100 ± 50           | 23 ± 4                          | 220                                                       |
| Kaempferol   | 130 ± 50           | 6.9 ± 1.0                       | 53                                                        |
| Naringenin   | 130 ± 3            | 3.8 ± 0.02                      | 12                                                        |
| UDP-GA       | 36 ± 3             |                                 | 280                                                       |

These kinetic parameters were determined using each purified protein. As described in the Methods section, kinetic parameters were calculated by fitting the initial velocity data to the Michaelis-Menten equation by nonlinear regression. Baicalein was used as sugar-acceptor for the  $k_{\text{cat}}$  value on UDP-GA.



**Supplemental Table 3, Sugar-donor specificity of Si UGT23, Am UGTcg10 and their mutants.**

| Name       | UGT                   | Relative activity (%) |         |        |
|------------|-----------------------|-----------------------|---------|--------|
|            |                       | UDP-Glc               | UDP-Gal | UDP-GA |
| Si UGT23   | UGT88D6 (WT)          | 1                     | 0       | 100    |
|            | UGT88D6 (S127T)       | 1                     | 0       | 100    |
|            | UGT88D6 (R354W)       | 100                   | 5       | 4      |
|            | UGT88D6 (S127T/R354W) | 100                   | 4       | 1      |
| Am UGTcg10 | UGT88D4 (WT)          | 0                     | 0       | 100    |
|            | UGT88D4 (S127T)       | 0                     | 1       | 100    |
|            | UGT88D4 (R355W)       | 100                   | 6       | 24     |
|            | UGT88D4 (S127T/R355W) | 100                   | 6       | 15     |

The glycosylation activity of each enzyme on three types of sugar-donor (UDP-Glucose, UGT-Galactose, and UDP-Glucuronic acid) was tested. Baicalein was used as sugar-acceptor for the evaluation of sugar-donor specificity. Products were quantified based on an absorbance peak at 350 nm. The highest activity in the three UDP-sugars is set at 100%.

Supplemental Table 4, Primer sequences

| Primer name    | UGT      | Primer Sequence (5'- 3')          | Underlined site |
|----------------|----------|-----------------------------------|-----------------|
| SI UGT-Fw      | UGT88D5  | AAACATATGGCGGTGCTGGCGAAGTTC       |                 |
| SI UGT-Rv      | UGT88D5  | TTTTGATCATTAAATCCCGAGTGGCGTGAAG   |                 |
| GR-SI UGT-Rv   | UGT88D5  | TGGGAGGCAAACCAGGGATCTCGACAA       |                 |
| SI UGT-nest-Rv | UGT88D5  | AATCATCCAAATCTTTAAGGT             |                 |
| GR-SI UGT-Fw   | UGT88D5  | AGAAGGGGTGTGTTCTCCGCTGAGCAA       |                 |
| SI UGT-nest-Fw | UGT88D5  | GAACAGCGGTCACAGATTTCT             |                 |
| Pf 50-Fw       | UGT88D7  | AAACATATGGAAGGCGTCATACTTC         | NdeI            |
| Pf 50-Rv       | UGT88D7  | TTTTGATCATTAAATCACGAGTTACGGAATC   | BclI            |
| Pf 57-Fw       | UGT88A7  | AGGATCCGATGGAAAGTACCACTAGTATAG    | BamHI           |
| Pf 57-Rv       | UGT88A7  | TGGATCCTTAGGCAGAGTTCCACAAG        | BamHI           |
| Am UGTcg10-Fw  | UGT88D4  | AAACATATGGAGGACACTATCGTTCTC       | NdeI            |
| Am UGTcg10-Rv  | UGT88D4  | TTGGATCCTTAAGAAACCACCATATCAAC     | BamHI           |
| SI UGT1-Fw     | UGT88D5  | AAACATATGGAGGACACGATTGTTATC       | NdeI            |
| SI UGT1-Rv     | UGT88D5  | TTCATATGTCAATCCCTCGTGGCCAGAAG     | NdeI            |
| Si UGT23-Fw    | UGT88D6  | CACCATATGGAAGACACCGTTGTCCTCTA     | NdeI            |
| Si UGT23-Rv    | UGT88D6  | GGATCCTAACATCACTCAAACCCGAGTCA     | BamHI           |
| Pf UGT2-Fw     | UGT73A7  | AAACATATGGTGACAATGGCGATAAACG      | NdeI            |
| Pf UGT2-Rv     | UGT73A7  | TTTGGATCCTTACTGGACTACAATTTTCAG    | BamHI           |
| Pf UGT31-Fw    | UGT73A13 | AAACATATGAAACAGCTACACATCGTTC      | NdeI            |
| Pf UGT31-Rv    | UGT73A13 | TTTGGATCCCTAGTTTATGTTATGTTTGGTG   | BamHI           |
| Am UGT21-Fw    | UGT73A9  | AAACATATGGGAAAACCTTCACATTGCC      | NdeI            |
| Am UGT21-Rv    | UGT73A9  | TTTGGATCCCTAGTTTAAGTCTTGTTTTTC    | BamHI           |
| Am UGT36-Fw    | UGT73E2  | AAAGGATCCGATGGCCATTCATGAACAAAAAC  | BamHI           |
| Am UGT36-Rv    | UGT73E2  | TTTGGATCCTCATGTATTTATAACTGTAACACC | BamHI           |
| Am UGT38-Fw    | UGT73N1  | AAACATATGGCCTTTCAAATTCAACC        | NdeI            |
| Am UGT38-Rv    | UGT73N1  | TTTGGATCCTTACACATCCCTCGCTACAC     | BamHI           |
| At UGT88A1-Fw  | UGT88A1  | CACCCATATGGGTGAAGAAGCTATAGTT      | NdeI            |

|                     |         |                                      |       |
|---------------------|---------|--------------------------------------|-------|
| At UGT88A1-Rv       | UGT88A1 | <u>GGATCCT</u> CACTTTGGGCTCCACGACTG  | BamHI |
| Pf 50-S127T-Fw      | UGT88D7 | TTCTACGTC <u>ACCACCGGTTCC</u>        | Thr   |
| Pf 50-S127T-Rv      | UGT88D7 | GGAACCGGT <u>GGT</u> GACGTAGAA       | Thr   |
| Pf 50-R350W-Fw      | UGT88D7 | ACTCACTGTGGGT <u>GGAGCTCGATT</u>     | Trp   |
| Pf 50-R350W-Rv      | UGT88D7 | AATCGAGCT <u>CCACCCACAGTGAGT</u>     | Trp   |
| Pf 57-T139S-Fw      | UGT88A7 | TACTTCATC <u>AGCTCCGGGGCTCA</u>      | Ser   |
| Pf 57-T139S-Rv      | UGT88A7 | TGAGCCCCGG <u>AGCT</u> GATGAAGTA     | Ser   |
| Pf 57-W367R-Fw      | UGT88A7 | ACTCACTGCGGG <u>CGGA</u> ACTCGACT    | Arg   |
| Pf 57-W367R-Rv      | UGT88A7 | AGTCGAGTT <u>CCGCCCGCAGTGAGT</u>     | Arg   |
| Gm IF7GlcT-T150S-Fw | UGT88E3 | ACTTCTACTAC <u>AGTTCTGGCGCCT</u>     | Ser   |
| Gm IF7GlcT-T150S-Rv | UGT88E3 | AGGCGCCAGAA <u>CTGTAGTAGAAGT</u>     | Ser   |
| Gm IF7GlcT-W371R-Fw | UGT88E3 | TCACTGCGGT <u>AGGA</u> ACTCGGTGTT    | Arg   |
| Gm IF7GlcT-W371R-Rv | UGT88E3 | AACACCGAGTT <u>CCTACCGCAGTGA</u>     | Arg   |
| Si UGT23-S127T-Fw   | UGT88D6 | TACTTCTACATC <u>ACCTCCGGCGCGTTT</u>  | Thr   |
| Si UGT23-S127T-Rv   | UGT88D6 | AAACGCGCCGG <u>AGGT</u> GATGTAGAAGTA | Thr   |
| Si UGT23-R354W-Fw   | UGT88D6 | CACTGCGGT <u>TGGAGCTCAATTCTGGAA</u>  | Trp   |
| Si UGT23-R354R-Rv   | UGT88D6 | TTCCAGAATTGAGCT <u>CCAACCGCAGTG</u>  | Trp   |
| Am UGTcg10-S127T-Fw | UGT88D4 | TTCTATGTC <u>ACCAGCGCGCGTTT</u>      | Thr   |
| Am UGTcg10-S127T-Rv | UGT88D4 | AAACGCGCCGCT <u>GGT</u> GACATAGAA    | Thr   |
| Am UGTcg10-R355W-Fw | UGT88D4 | ACGCACTGTGGGT <u>TGGAGTT</u> CGATA   | Trp   |
| Am UGTcg10-R355R-Rv | UGT88D4 | TATCGAACT <u>CCACCCACAGTGCGT</u>     | Trp   |
| Pf rRNA-Fw          |         | TTTGGTGTGTATGGGCATGTT                |       |
| Pf rRNA-Rv          |         | TTGCGCGCCTGCTGCCTTCCTT               |       |
| GR-Sb 7GAT-Rv       | UGT88D1 | GCCTGCCGATCCGCGCAGGTTCTTCGAAAT       |       |
| Sb 7GAT-nest-Rv     | UGT88D1 | AACAAG ACTCTTACGCGTGAGCAA            |       |
| Am UGT88-Fw2        |         | ATACCCACTTACTTCTATGTCAGC             |       |
| Am UGT88-Rv3        |         | ACCCTATTCATCCTCTGCTCC                |       |
| GR-Th 7GATH-Fw      |         | AACGGCTTGTGCGTGCCCCGGTCTCCTACT       |       |
| GR-Th 7GATH-Rv      |         | AGTAGGAGACCGGGGCACGCACAAGCCGTT       |       |
| Th F7GATH-nest-Fw   |         | AGACAATGGGTCCTTGGGTGA                |       |

Th F7GATH-nest-Rv

GAGTAAATTGGCGGGCAACCT
